# Supplementary material for: Severe and invasive bacterial infections in infants aged less than 90 days with and without SARS-CoV-2 infection
Source: Springer Nature journal article supplement (doi:10.1186/s13052-024-01721-x), 2024-08-15
Supplement: MOESM1 [file 13052_2024_1721_MOESM1_ESM.pdf]

**Table 2S** - Age distribution (number and percentage) of febrile neonates and infants 90 days or younger with severe bacterial infection before and during the COVID-19 pandemic

|                  |       | Prepandemic cohort |        |                          |        |                          |        | Pandemic cohort           |        |                           | pvalue |                           |        |                           |        |       |
|------------------|-------|--------------------|--------|--------------------------|--------|--------------------------|--------|---------------------------|--------|---------------------------|--------|---------------------------|--------|---------------------------|--------|-------|
|                  |       | Total (n=92)       |        | Mar 2017-Feb 2018 (n=18) |        | Mar 2018- Feb 2019 (n=7) |        | Mar 2019- Feb 2020 (n=24) |        | Mar 2020 -Feb 2021 (n=15) |        | Mar 2021 -Feb 2022 (n=16) |        | Mar 2022 -Dec 2022 (n=12) |        |       |
|                  |       | No.                | (%)    | No.                      | (%)    | No.                      | (%)    | No.                       | (%)    | No.                       |        | (%)                       | No.    | (%)                       | No.    | (%)   |
| Age group (days) | 0-21  | 31                 | (33.7) | 9                        | (50.0) | 2                        | (28.6) | 6                         | (25.0) | 3                         | (20.0) | 7                         | (43.7) | 4                         | (33.3) | 0.946 |
|                  | 22-28 | 6                  | (6.5)  | 1                        | (5.6)  | 1                        | (14.3) | 1                         | (4.2)  | 1                         | (6.7)  | 1                         | (6.3)  | 1                         | (8.3)  |       |
|                  | 29-60 | 29                 | (31.5) | 4                        | (22.2) | 2                        | (28.6) | 10                        | (41.7) | 6                         | (40.0) | 4                         | (25.0) | 3                         | (25.0) |       |
|                  | 61-90 | 26                 | (28.3) | 4                        | (22.2) | 2                        | (28.6) | 7                         | (29.2) | 5                         | (33.3) | 4                         | (25.0) | 4                         | (33.3) |       |

**Table S3** – Discharge diagnosis of febrile neonates and infants 90 days or younger during the COVID-19 pandemic period (March 2020-December 2022) by age group and the result of the SARS-CoV-2 test

|                                                    | <b>Total<br/>(n=193)</b> |               | <b>SARS-CoV-2<br/>positive<br/>(n=71)</b> |              | <b>SARS-CoV-2<br/>negative<br/>(n=122)</b> |               | <b>pvalue</b>     |
|----------------------------------------------------|--------------------------|---------------|-------------------------------------------|--------------|--------------------------------------------|---------------|-------------------|
|                                                    | <b>No.</b>               | <b>(%)</b>    | <b>No.</b>                                | <b>(%)</b>   | <b>No.</b>                                 | <b>(%)</b>    |                   |
| <b>Sepsi//bactermia<br/>suspected or confirmed</b> | <b>8</b>                 | <b>(4.2)</b>  | <b>2</b>                                  | <b>(2.8)</b> | <b>6</b>                                   | <b>(4.9)</b>  | <b>0.713</b>      |
| <i>Age group (days)</i>                            |                          |               |                                           |              |                                            |               |                   |
| 0-21                                               | 5                        |               | 1                                         |              | 4                                          |               |                   |
| 22-28                                              | 0                        |               | 0                                         |              | 0                                          |               |                   |
| 29-60                                              | 3                        |               | 1                                         |              | 2                                          |               |                   |
| 61-90                                              | 0                        |               | 0                                         |              | 0                                          |               |                   |
| <b>Urinary Tract Infections</b>                    | <b>47</b>                | <b>(24.4)</b> | <b>7</b>                                  | <b>(9.9)</b> | <b>40</b>                                  | <b>(32.8)</b> | <b>&lt;0.0001</b> |
| <i>Age group (days)</i>                            |                          |               |                                           |              |                                            |               |                   |
| 0-21                                               | 12                       |               | 1                                         |              | 11                                         |               |                   |
| 22-28                                              | 4                        |               | 1                                         |              | 3                                          |               |                   |
| 29-60                                              | 16                       |               | 5                                         |              | 11                                         |               |                   |
| 61-90                                              | 15                       |               | 0                                         |              | 15                                         |               |                   |
| <b>Meningitis</b>                                  | <b>5</b>                 | <b>(2.6)</b>  | <b>0</b>                                  | <b>(0.0)</b> | <b>5</b>                                   | <b>(4.1)</b>  | <b>0.160</b>      |
| <i>Age group (days)</i>                            |                          |               |                                           |              |                                            |               |                   |
| 0-21                                               | 4                        |               | 0                                         |              | 4                                          |               |                   |
| 22-28                                              | 0                        |               | 0                                         |              | 0                                          |               |                   |
| 29-60                                              | 1                        |               | 0                                         |              | 1                                          |               |                   |
| 61-90                                              | 0                        |               | 0                                         |              | 0                                          |               |                   |

**Table S4** - Age distribution (number and percentage) of febrile neonates and infants 90 days or younger with severe bacterial infection, positive and negative at the SARS-CoV-2 test

|                  | <b>Total<br/>(n=43)</b> |            | <b>SARS-CoV-2<br/>positive<br/>(n=6)</b> |            | <b>SARS-CoV-2<br/>negative<br/>(n=37)</b> |            | <b>pvalue</b> |       |
|------------------|-------------------------|------------|------------------------------------------|------------|-------------------------------------------|------------|---------------|-------|
|                  | <b>No.</b>              | <b>(%)</b> | <b>No.</b>                               | <b>(%)</b> | <b>No.</b>                                | <b>(%)</b> |               |       |
| Age group (days) | 0-21                    | 14         | (32.6)                                   | 2          | (33.3)                                    | 12         | (32.4)        | 0.214 |
|                  | 22-28                   | 3          | (7.0)                                    | 1          | (16.7)                                    | 2          | (5.4)         |       |
|                  | 29-60                   | 13         | (30.2)                                   | 3          | (50.0)                                    | 10         | (27.0)        |       |
|                  | 61-90                   | 13         | (30.2)                                   | 0          | (-)                                       | 13         | (35.1)        |       |

**Table S5** – Blood and urine cultures of febrile neonates and infants 90 days or younger during the COVID-19 pandemic period (March 2020-December 2022) stratified based on the results of SARS-CoV-2 swab

|                                 | <b>Total<br/>(n=193)</b> |            | <b>SARS-CoV-2<br/>positive<br/>(n=71)</b> |            | <b>SARS-CoV-2<br/>negative<br/>(n=122)</b> |            | <b>pvalue</b> |
|---------------------------------|--------------------------|------------|-------------------------------------------|------------|--------------------------------------------|------------|---------------|
|                                 | <b>No.</b>               | <b>(%)</b> | <b>No.</b>                                | <b>(%)</b> | <b>No.</b>                                 | <b>(%)</b> |               |
| <b>Blood culture</b>            |                          |            |                                           |            |                                            |            | 0.387         |
| Not performed                   | 22                       | (11.4)     | 10                                        | (14.1)     | 12                                         | (9.8)      |               |
| Failed procedure                | 4                        | (2.1)      | 3                                         | (4.2)      | 1                                          | (0.8)      |               |
| Performed - negative            | 153                      | (79.3)     | 53                                        | (74.6)     | 100                                        | (82.0)     |               |
| Performed – not available       | 1                        | (0.5)      | 0                                         | (-)        | 1                                          | (0.8)      |               |
| Performed - positive            | 13                       | (6.7)      | 5                                         | (7.0)      | 8                                          | (6.6)      |               |
| <i>CoNs</i>                     | 5                        |            | 2                                         |            | 3                                          |            |               |
| <i>E. coli</i>                  | 2                        |            | 1                                         |            | 1                                          |            |               |
| <i>Streptococcus agalactiae</i> | 2                        |            | 0                                         |            | 2                                          |            |               |
| <i>Enterococchi</i>             | 1                        |            | 1                                         |            | 0                                          |            |               |
| <i>S. aureus</i>                | 1                        |            | 0                                         |            | 1                                          |            |               |
| <i>Klebsiella pneumoniae</i>    | 1                        |            | 0                                         |            | 1                                          |            |               |
| <i>Kocuria rhizophila</i>       | 1                        |            | 1                                         |            | 0                                          |            |               |
| <b>Urine culture</b>            |                          |            |                                           |            |                                            |            | 0.001         |
| Not performed                   | 51                       | (26.4)     | 23                                        | (32.4)     | 28                                         | (23.0)     |               |
| Failed procedure                | 4                        | (2.1)      | 4                                         | (5.6)      | 0                                          | (-)        |               |
| Performed - negative            | 72                       | (37.3)     | 30                                        | (42.3)     | 42                                         | (34.4)     |               |
| Performed – not available       | 1                        | (0.5)      | 0                                         | (-)        | 1                                          | (0.8)      |               |
| Performed - contaminated        | 12                       | (6.2)      | 5                                         | (7.0)      | 7                                          | (5.7)      |               |
| Performed - positive            | 53                       | (27.5)     | 9                                         | (12.7)     | 44                                         | (36.1)     |               |
| <i>E. coli</i>                  | 36                       |            | 6                                         |            | 30                                         |            |               |
| <i>Klebsiella pneumoniae</i>    | 5                        |            | 0                                         |            | 5                                          |            |               |
| <i>Enterococchi</i>             | 2                        |            | 0                                         |            | 2                                          |            |               |
| <i>Citrobacter</i>              | 2                        |            | 0                                         |            | 2                                          |            |               |
| <i>Enterobacter aerogenes</i>   | 2                        |            | 1                                         |            | 1                                          |            |               |
| <i>Klebsiella oxytoca</i>       | 4                        |            | 2                                         |            | 2                                          |            |               |
| <i>s. Agalactiae</i>            | 1                        |            | 0                                         |            | 1                                          |            |               |
| <i>Other</i>                    | 0                        |            | 0                                         |            | 1                                          |            |               |

**Table S6** – Microbiological tests on CSF of febrile neonates and infants 90 days or younger during the COVID-19 pandemic period (March 2020-December 2022) stratified based on the results of SARS-CoV-2 swab

|                                  | <b>Total<br/>(n=56)</b> |            | <b>SARS-CoV-2<br/>positive<br/>(n=13)</b> |            | <b>SARS-CoV-2<br/>negative<br/>(n=43)</b> |            |
|----------------------------------|-------------------------|------------|-------------------------------------------|------------|-------------------------------------------|------------|
|                                  | <b>No.</b>              | <b>(%)</b> | <b>No.</b>                                | <b>(%)</b> | <b>No.</b>                                | <b>(%)</b> |
| <b>Film-array panel on CSF</b>   |                         |            |                                           |            |                                           |            |
| Not performed                    | 2                       | (3.6)      | 2                                         | (15.4)     | 0                                         | (-)        |
| Performed - negative             | 41                      | (73.2)     | 10                                        | (76.9)     | 31                                        | (72.1)     |
| Performed - positive             | 13                      | (23.2)     | 1                                         | (7.7)      | 12                                        | (27.9)     |
| <i>Enterovirus</i>               | 7                       |            | 0                                         |            | 7                                         |            |
| <i>Streptococcus agalactiae.</i> | 2                       |            | 0                                         |            | 2                                         |            |
| <i>HHV-6</i>                     | 2                       |            | 1                                         |            | 1                                         |            |
| <i>E. coli</i>                   | 1                       |            | 0                                         |            | 1                                         |            |
| <i>Other</i>                     | 1                       |            | 0                                         |            | 1                                         |            |
| <b>CSF culture</b>               |                         |            |                                           |            |                                           |            |
| Failed procedure                 | 3                       | (5.4)      | 3                                         | (23.1)     | 0                                         | (-)        |
| Performed - negative             | 49                      | (87.5)     | 10                                        | (76.9)     | 39                                        | (90.7)     |
| Performed - positive             | 4                       | (7.1)      | 0                                         | (-)        | 4                                         | (9.3)      |
| <i>Streptococcus agalactiae</i>  | 2                       |            | 0                                         |            | 2                                         |            |
| <i>E. coli</i>                   | 1                       |            | 0                                         |            | 1                                         |            |
| <i>Staphylococcus hominis</i>    | 1                       |            | 0                                         |            | 1                                         |            |
